# Supplementary material for: Circ-HuR suppresses HuR expression and gastric cancer progression by inhibiting CNBP transactivation
Source: PubMed Central journal article supplement (PMC6852727; doi:10.1186/s12943-019-1094-z), 2019-11-13
Supplement: 12943_2019_1094_MOESM1_ESM.pdf [file 12943_2019_1094_MOESM1_ESM.pdf]

## **Additional files**

***Circ-HuR* suppresses HuR expression and gastric cancer progression by inhibiting CNBP transactivation**

Yang, et al.

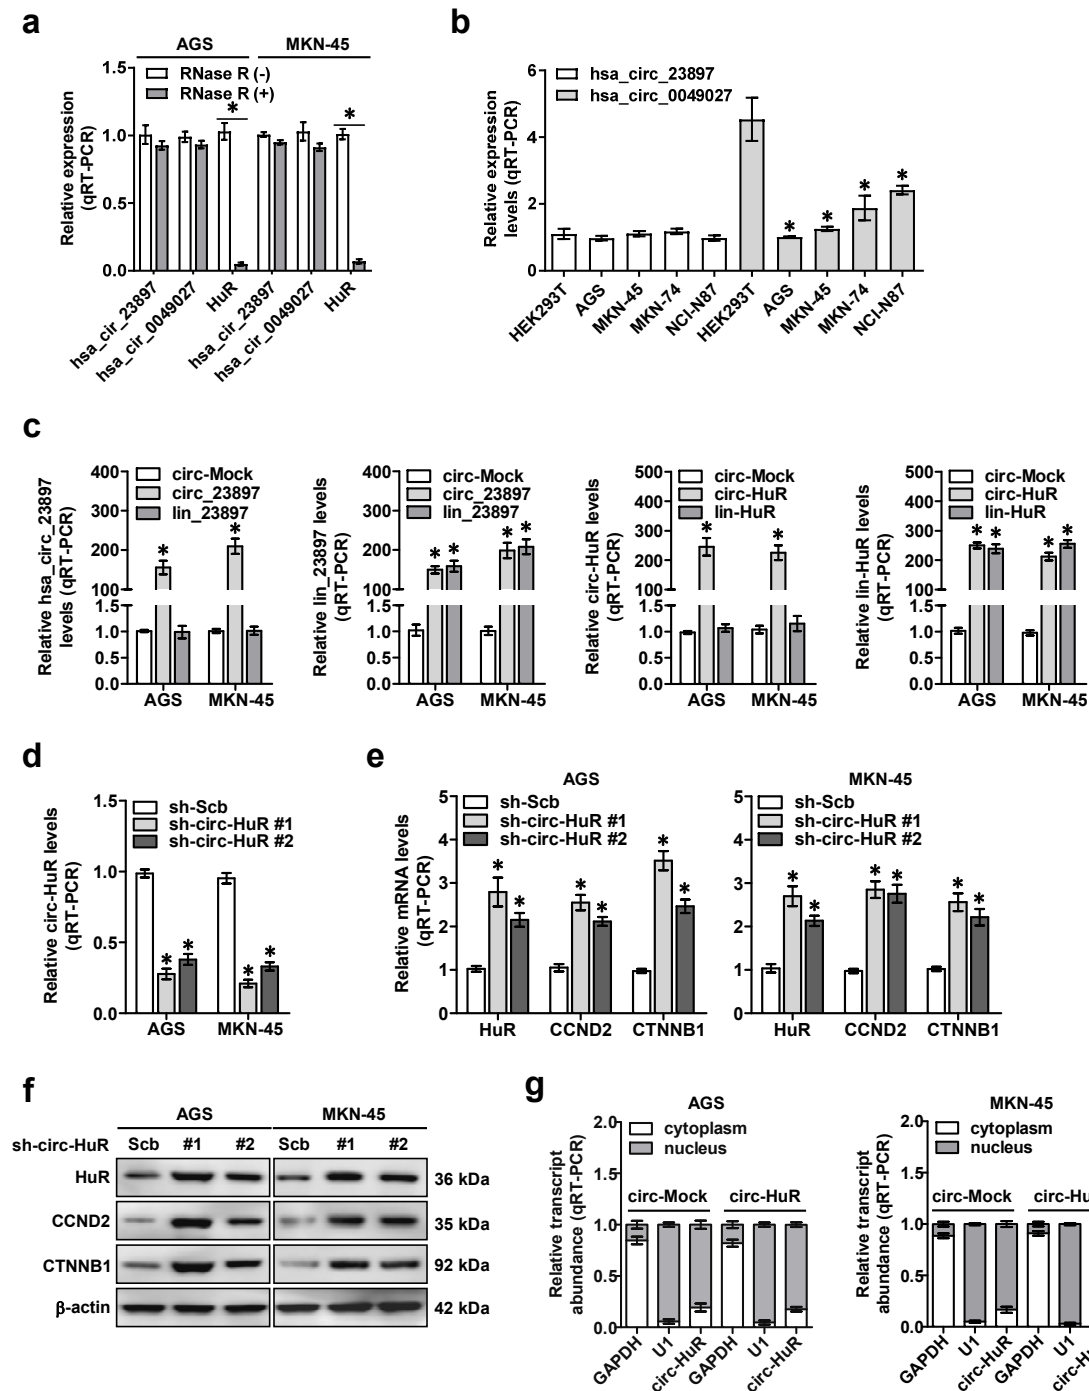

**Figure S1. Expression of *HuR*-derived circRNAs and their effects on *HuR* expression in gastric cancer cells. a** Real-time qRT-PCR assay indicating the levels (normalized to  $\beta$ -actin,  $n=5$ ) of *hsa\_circ\_23897* or *hsa\_circ\_0049027* after RNase R treatment (3 U/mg) in AGS and MKN-45 cells. **b** Real-time qRT-PCR assay revealing the relative levels of *circ-HuR* (normalized to  $\beta$ -actin,  $n=5$ ) in HEK293T and gastric cancer cell lines. **c** Real-time qRT-PCR assay showing the levels (normalized to  $\beta$ -actin,  $n=5$ ) of *hsa\_circ-23897*, linear *hsa\_circ-23897* (*lin\_23897*), *circ-HuR*, and linear *circ-HuR* (*lin-HuR*) in AGS and MKN-45 cells stably transfected with empty vector (*circ-Mock*), *hsa\_circ-23897* (*circ\_23897*), *lin\_23897*, *circ-HuR*, or *lin-HuR*. **d** Real-time qRT-PCR assay indicating the levels (normalized to  $\beta$ -actin,  $n=5$ ) of *HuR* in AGS and MKN-45 cells stably transfected with scramble shRNA (sh-Scb), sh-*circ-HuR* #1, or sh-*circ-HuR* #2. **e** and **f** Real-time qRT-PCR (**e**, normalized to  $\beta$ -actin,  $n=5$ ) and western blot (**f**) assays revealing the transcript and protein levels of *HuR* and its downstream target genes in AGS and MKN-45 cells stably transfected with sh-Scb, sh-*circ-HuR* #1, or sh-*circ-HuR* #2. **g** Real-time qRT-PCR indicating the distribution of *GAPDH*, *U1*, and *circ-HuR* in the cytoplasmic and nuclear fractions of AGS and MKN-45 cells stably transfected with *circ-Mock* or *circ-HuR*. Student's *t*-test or ANOVA analyzed the difference in **a-e**. \*  $P < 0.01$  vs. RNase R (-), HEK293T, *circ-Mock*, or sh-Scb. Data are shown as mean  $\pm$  SEM (error bars) and representative of three independent experiments in **a-g**.

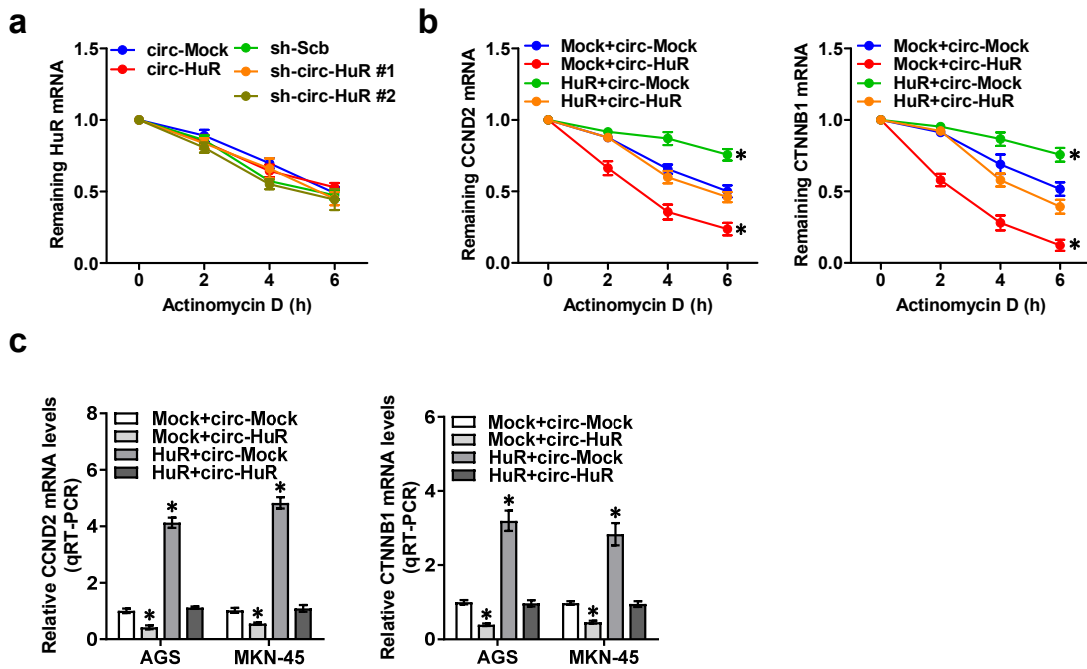

**Figure S2. Effects of *circ-HuR* on expression of *HuR* and downstream genes in gastric cancer cells.** **a** Real-time qRT-PCR assay indicating the half-life of *HuR* mRNA (normalized to  $\beta$ -actin,  $n=5$ ) in AGS cells stably transfected with empty vector (*circ-Mock*), *circ-HuR*, scramble shRNA (sh-Scb), sh-*circ-HuR* #1, or sh-*circ-HuR* #2, and those treated with actinomycin D (1  $\mu$ g/mL) for indicated periods of time. **b** and **c** Real-time qRT-PCR assay showing the half-life and levels of *CCND2* and *CTNNB1* mRNA (normalized to  $\beta$ -actin,  $n=5$ ) in AGS cells stably transfected with empty vector (mock), *HuR*, *circ-Mock*, or *circ-HuR*, and those treated with actinomycin D (1  $\mu$ g/mL) for indicated periods of time. Student's *t*-test or ANOVA analyzed the difference in **a-c**. \*  $P<0.01$  vs. mock+*circ-Mock*. Data are shown as mean  $\pm$ SEM (error bars) and representative of three independent experiments in **a-c**.

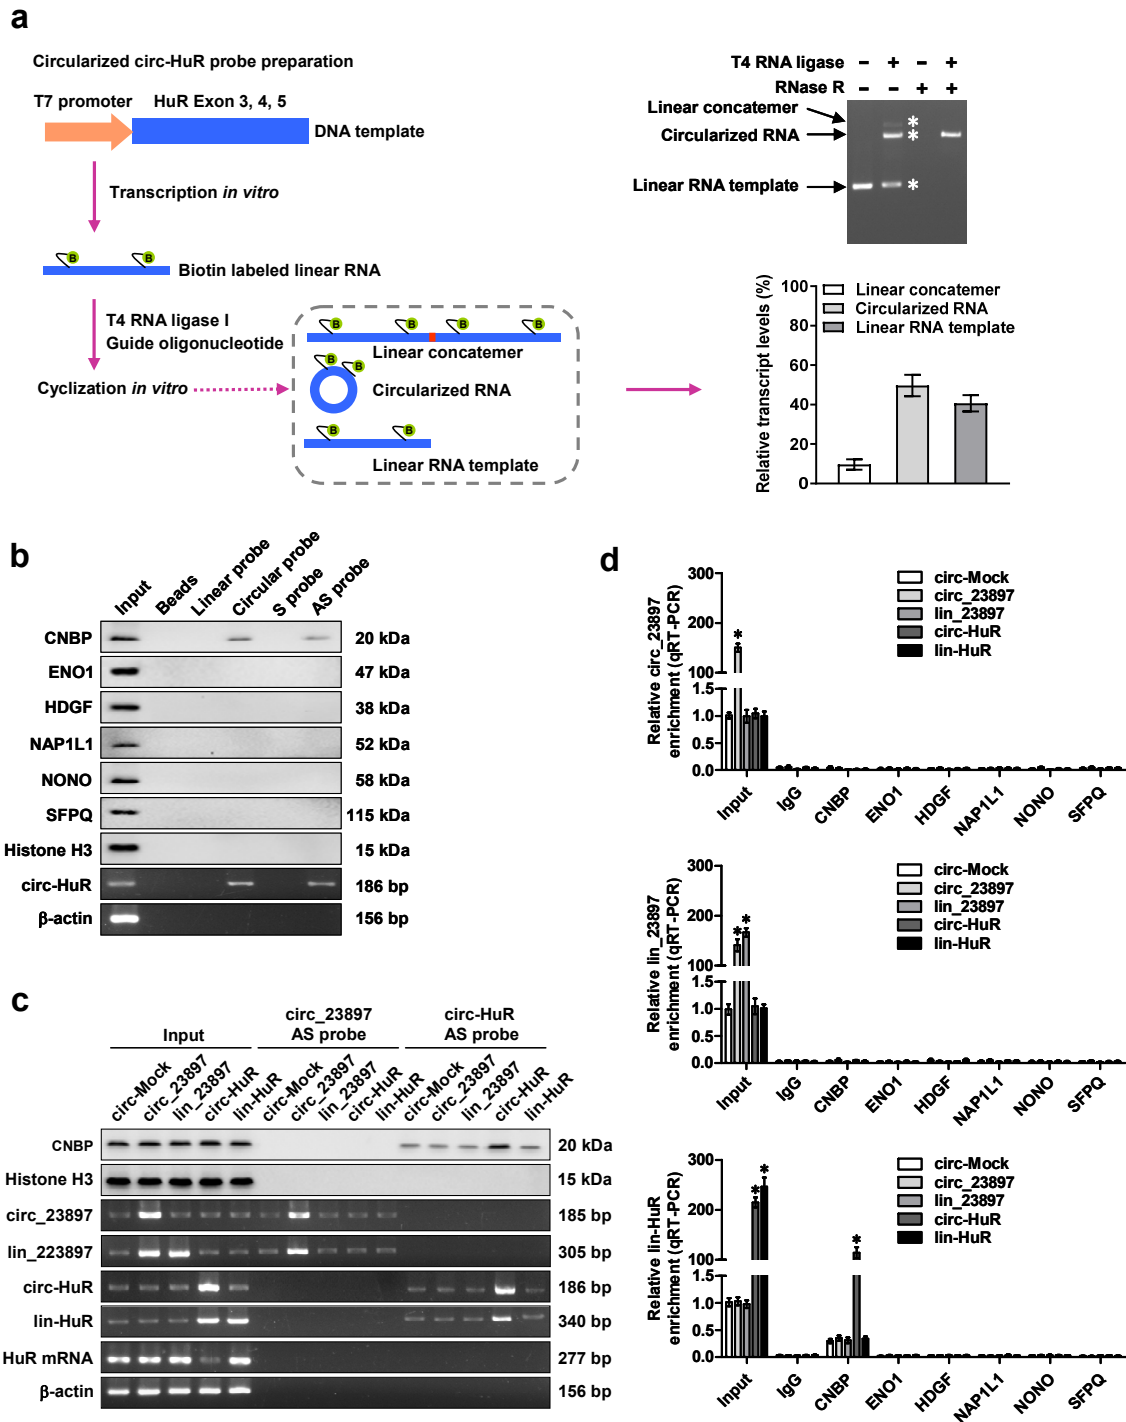

**Figure S3. Interaction between *circ-HuR* and CNBP protein in gastric cancer cells.** **a** Schematic diagram showing the process to generate biotin-labeled *circ-HuR* probe by ligation of *in vitro* transcribed linear transcript (left panel), and validation by denaturing PAGE, SYBR Green II staining, and RNase R (3 U/mg) treatment (right upper panel), with circularization efficiency as indicated (right lower panel). **b** Western blot (upper panel) and RT-PCR (lower panel) assays indicating the proteins and transcripts pulled down by biotin-labeled linear or circular exogenous *circ-HuR*, sense (S) or antisense (AS) probe targeting junction site of endogenous *circ-HuR* from AGS cell lysates. **c** Western blot (upper panel) and RT-PCR (lower panel) assays revealing the proteins and transcripts pulled down by biotin-labeled antisense (AS) probe targeting junction site of *hsa\_circ-23897* (*circ\_23897*) or *circ-HuR* from lysates of AGS cells stably transfected with empty vector (*circ-Mock*), *circ\_23897*, linear *circ\_23897* (*lin\_23897*), *circ-HuR*, or linear *circ-HuR* (*lin-HuR*). **d** RIP and real-time qRT-PCR assays showing the interaction of *circ\_23897*, *lin\_23897*, or *lin-HuR* with six proteins in AGS cells stably transfected with *circ-Mock*, *circ\_23897*, *lin\_23897*, *circ-HuR*, or *lin-HuR*. ANOVA analyzed the difference in **d**. \*  $P < 0.01$  vs. *circ-Mock*. Data are shown as mean  $\pm$  SEM (error bars) and representative of three independent experiments in **b-d**.

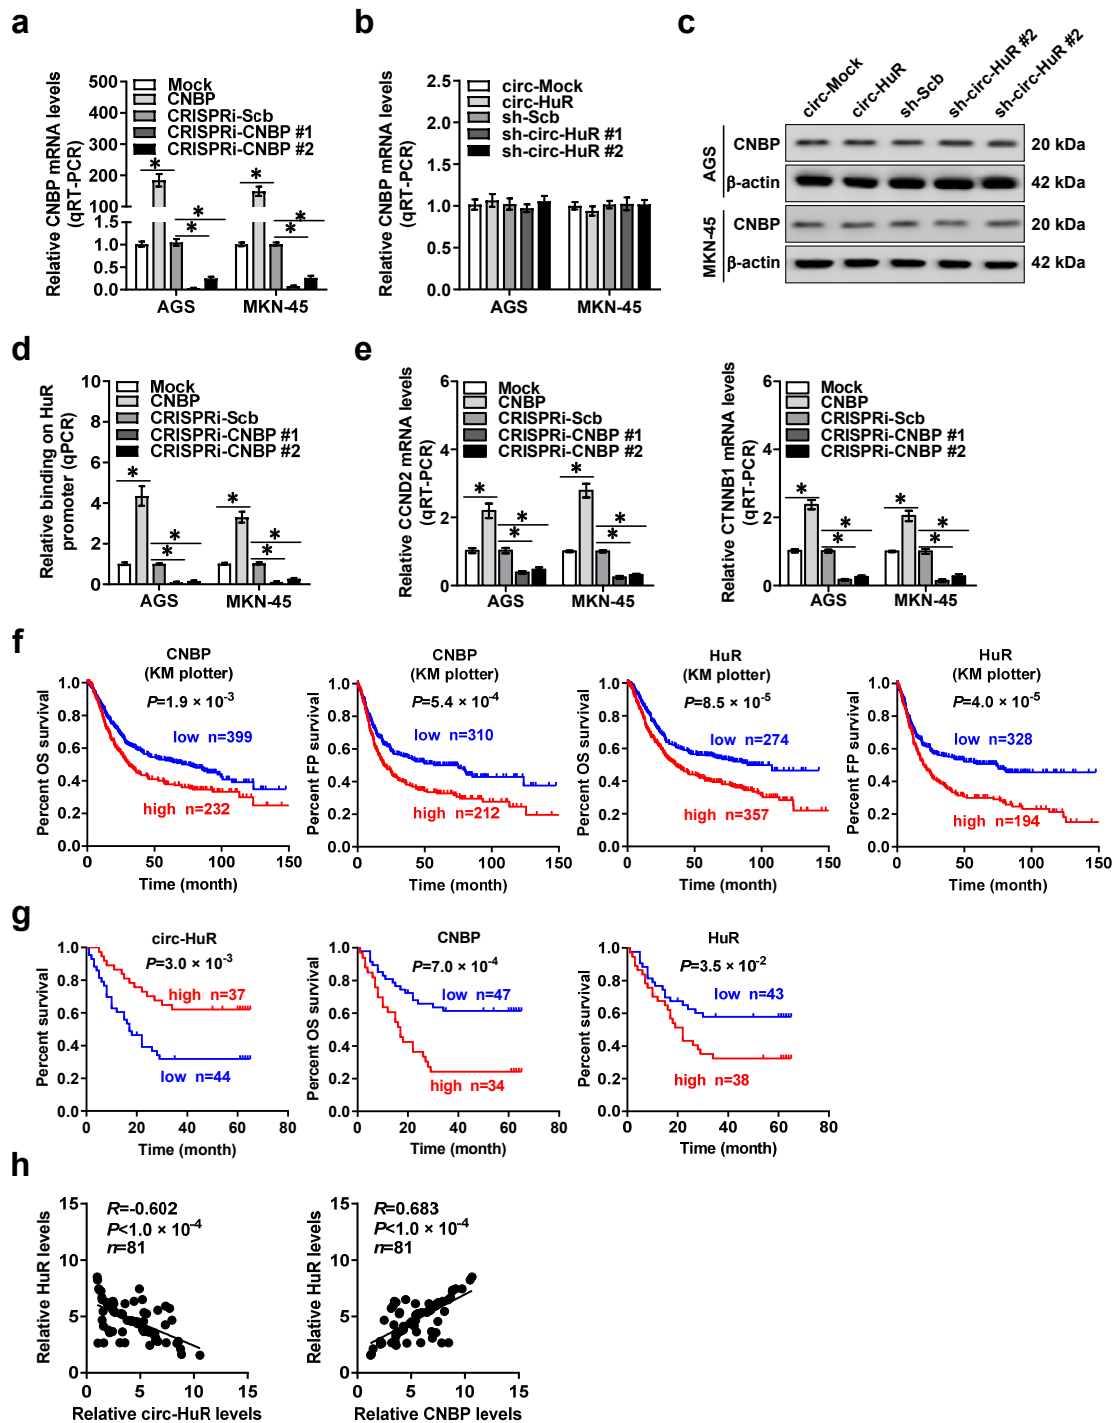

**Figure S4. Roles of *circ-HuR* and CNBP in regulating transcription of *HuR* and downstream genes.** **a** Real-time qRT-PCR assay indicating the *CNBP* transcript levels (normalized to  $\beta$ -actin,  $n=5$ ) in AGS and MKN-45 cells stably transfected with empty vector (mock), *CNBP*, CRISPRi-Scb, CRISPRi-CNBP #1, or CRISPRi-CNBP #2. **b** and **c** Real-time qRT-PCR assay (**b**, normalized to  $\beta$ -actin,  $n=5$ ) and western blot (**c**) assays showing the transcript and protein levels of *CNBP* in AGS and MKN-45 cells stably transfected with empty vector (*circ-Mock*), *circ-HuR*, sh-Scb, sh-*circ-HuR* #1, or sh-*circ-HuR* #2. **d** ChIP and qPCR assays indicating the changes in the binding of CNBP (normalized to input) to *HuR* promoter in AGS and MKN-45 cells stably transfected with mock, *CNBP*, CRISPRi-Scb, CRISPRi-CNBP #1, or CRISPRi-CNBP #2. **e** Real-time qRT-PCR assay revealing the transcript levels (normalized to  $\beta$ -actin,  $n=5$ ) of *CCND2* and *CTNNB1* in AGS and MKN-45 cells stably transfected with mock, *CNBP*, CRISPRi-Scb, CRISPRi-CNBP #1, or CRISPRi-CNBP #2. **f** Overall (OS) and first progression (FP) survival of gastric cancer samples derived from Kaplan-Meier Plotter database (<http://kmplot.com/analysis>), with high or low expression of *CNBP* (cutoff values=487.0 and 482.0) or *HuR* (cutoff values=363.5 and 419.5). **g** Kaplan-Meier curves showing the survival of 81 gastric cancer patients with low or high expression of *circ-HuR* (cutoff value=4.1), *CNBP* (cutoff value=5.5), or *HuR* (cutoff value=4.7). **h** The expression correlation of *HuR* with *circ-HuR* or *CNBP* in 81 gastric cancer tissues. Student's *t*-test or ANOVA analyzed the difference in **a**, **b**, **d**, and **e**. Log-rank test for survival comparison in **f** and **g**. Pearson's correlation coefficient analysis for gene expression in **h**. \* $P<0.01$  vs. mock, CRISPRi-Scb, *circ-Mock*, or sh-Scb. Data are shown as mean  $\pm$  SEM (error bars) and representative of three independent experiments in **a-e**.

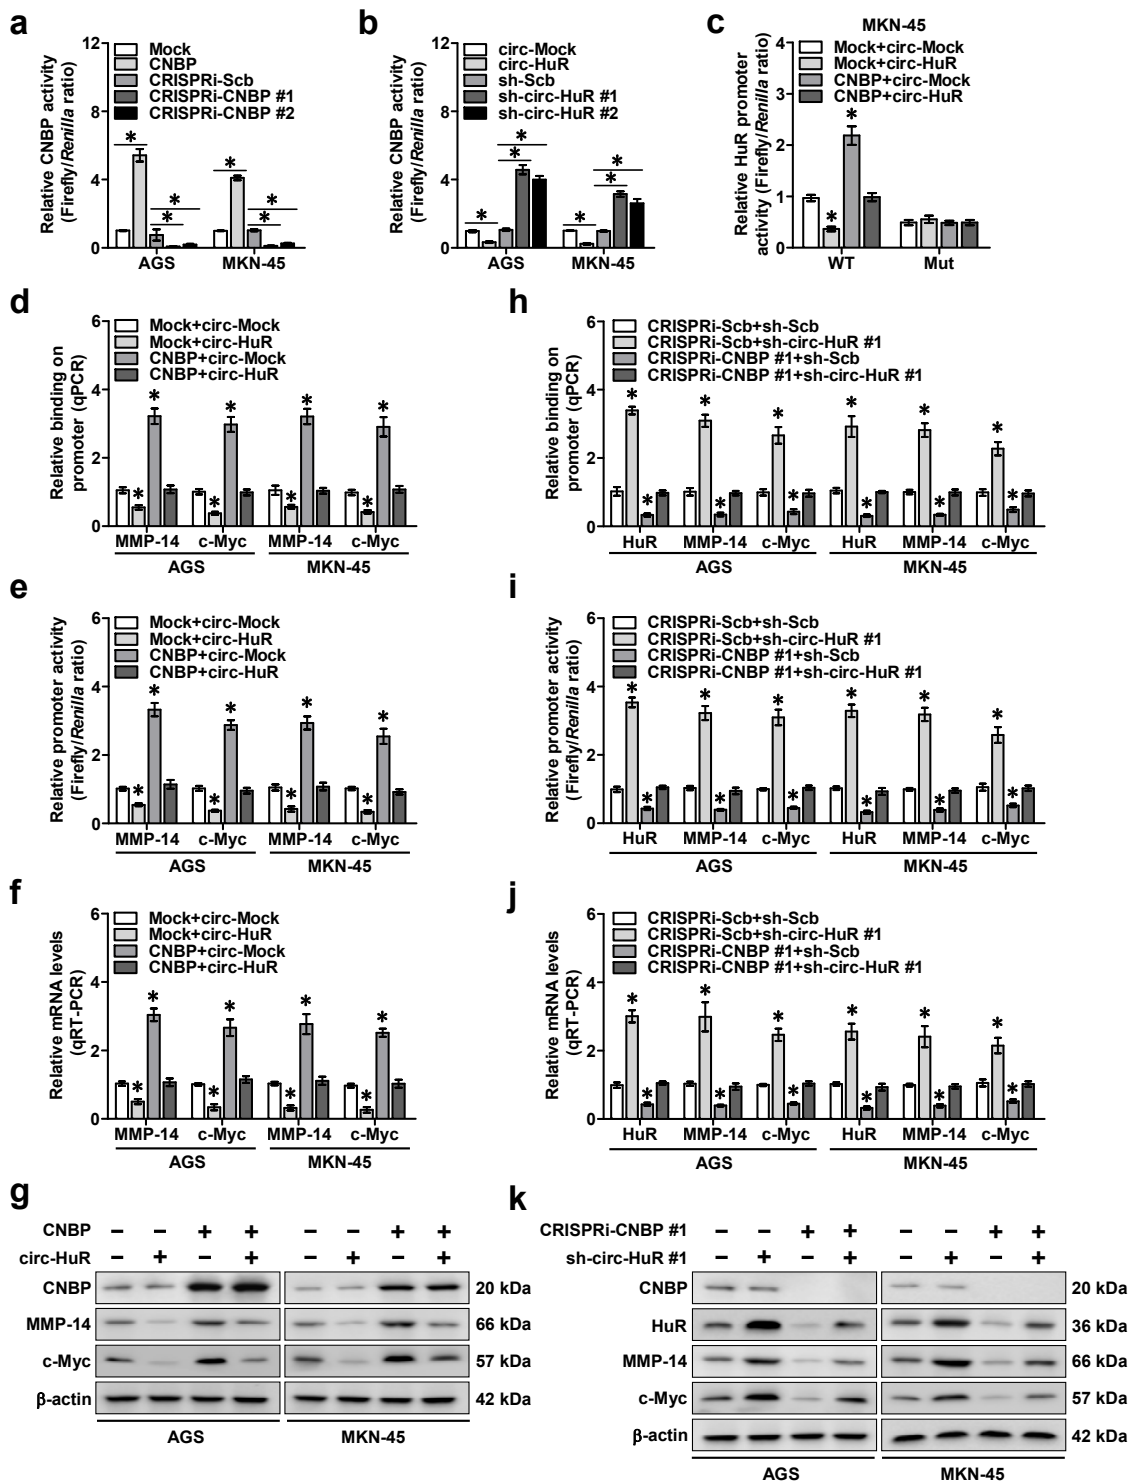

**Figure S5. *circ-HuR* regulates CNBP transactivation and target gene expression in gastric cancer cells.** **a** Dual-luciferase assay revealing the activity of CNBP in AGS and MKN-45 cells stably transfected with empty vector (mock), *CNBP*, CRISPRi-Scb, CRISPRi-CNBP #1, or CRISPRi-CNBP #2 ( $n=5$ ). **b** Dual-luciferase assay indicating the activity of CNBP in AGS and MKN-45 cells stably transfected with empty vector (*circ-Mock*), *circ-HuR*, scramble shRNA (sh-Scb), sh-*circ-HuR* #1, or sh-*circ-HuR* #2 ( $n=6$ ). **c** Dual-luciferase assay showing the activity of *HuR* promoter with wild type (WT) or mutant (Mut) CNBP binding site in AGS and MKN-45 cells stably transfected with mock or *CNBP*, and those co-transfected with *circ-HuR* ( $n=5$ ). **d-g** ChIP and qPCR (d), dual-luciferase reporter (e), real-time qRT-PCR (f, normalized to  $\beta$ -actin,  $n=5$ ), and western blot (g) assays showing the CNBP enrichment, promoter activity, transcript and protein levels of *MMP-14* and *c-Myc* in AGS and MKN-45 cells stably transfected with *circ-Mock* or *circ-HuR*, and those co-transfected with *CNBP*. **h-k** ChIP and qPCR (h), dual-luciferase reporter (i), real-time qRT-PCR (j, normalized to  $\beta$ -actin,  $n=5$ ), and western blot (k) assays showing the CNBP enrichment, promoter activity, transcript and protein levels of *MMP-14* and *c-Myc* in AGS and MKN-45 cells stably transfected with sh-Scb or sh-*circ-HuR* #1, and those co-transfected with CRISPRi-Scb or CRISPRi-CNBP #1. Student's *t*-test or ANOVA analyzed the difference in **a-f** and **h-j**. \*  $P < 0.01$  vs. mock, CRISPRi-Scb, circ-Mock, sh-Scb, mock+circ-Mock, or CRISPRi-Scb+sh-Scb. Data are shown as mean  $\pm$  SEM (error bars) and representative of three independent experiments in **a-k**.

**Table S1 Univariate and multivariate analysis of prognostic factors in gastric cancer patients**

| Clinicopathologic factor     | n  | Univariate analysis        |                 | Multivariate analysis |             |                 |
|------------------------------|----|----------------------------|-----------------|-----------------------|-------------|-----------------|
|                              |    | Mean $\pm$ SEM<br>(months) | <i>P</i> -value | Hazard ratio          | 95% CI      | <i>P</i> -value |
| <b>Age (years)</b>           |    |                            |                 |                       |             |                 |
| ≤60                          | 42 | 39.1 $\pm$ 4.1             | 0.332           | 1.374                 | 0.755-2.500 | 0.298           |
| >60                          | 39 | 34.3 $\pm$ 4.2             |                 |                       |             |                 |
| <b>Sex</b>                   |    |                            |                 |                       |             |                 |
| Male                         | 57 | 33.9 $\pm$ 3.5             | 0.168           | 0.572                 | 0.281-1.163 | 0.123           |
| Female                       | 24 | 43.7 $\pm$ 5.3             |                 |                       |             |                 |
| <b>Size (diameter)</b>       |    |                            |                 |                       |             |                 |
| ≤6 cm                        | 40 | 33.6 $\pm$ 4.2             | 0.221           | 0.736                 | 0.404-1.341 | 0.736           |
| >6 cm                        | 41 | 39.9 $\pm$ 4.1             |                 |                       |             |                 |
| <b>Laurén classification</b> |    |                            |                 |                       |             |                 |
| Intestinal type              | 47 | 36.3 $\pm$ 3.8             | 0.731           | 0.822                 | 0.444-1.521 | 0.533           |
| Diffuse type                 | 34 | 37.5 $\pm$ 4.6             |                 |                       |             |                 |
| <b>Gastric wall invasion</b> |    |                            |                 |                       |             |                 |
| T1/T2                        | 34 | 49.1 $\pm$ 4.1             | <0.001          | 1.266                 | 1.066-2.901 | 0.213           |
| T3/T4                        | 47 | 27.9 $\pm$ 3.6             |                 |                       |             |                 |
| <b>Lymph node metastasis</b> |    |                            |                 |                       |             |                 |
| Negative                     | 22 | 51.6 $\pm$ 5.3             | <0.001          | 1.368                 | 1.052-2.894 | 0.135           |
| Positive                     | 59 | 31.2 $\pm$ 3.3             |                 |                       |             |                 |
| <b>Distant metastasis</b>    |    |                            |                 |                       |             |                 |
| Negative                     | 62 | 41.9 $\pm$ 3.2             | <0.001          | 2.809                 | 1.432-5.511 | 0.002           |
| Positive                     | 19 | 20.3 $\pm$ 5.4             |                 |                       |             |                 |
| <b>TNM stage</b>             |    |                            |                 |                       |             |                 |
| I/II                         | 27 | 48.3 $\pm$ 4.7             | 0.003           | 2.519                 | 1.193-5.319 | 0.015           |
| III/IV                       | 54 | 31.1 $\pm$ 3.5             |                 |                       |             |                 |
| <b>circ-HuR expression</b>   |    |                            |                 |                       |             |                 |
| Low                          | 44 | 28.3 $\pm$ 3.8             | 0.003           | 0.616                 | 0.440-0.861 | 0.012           |
| High                         | 37 | 46.9 $\pm$ 3.9             |                 |                       |             |                 |
| <b>CNBP expression</b>       |    |                            |                 |                       |             |                 |
| Low                          | 47 | 45.4 $\pm$ 3.7             | <0.001          | 2.643                 | 1.194-4.260 | 0.003           |
| High                         | 34 | 25.1 $\pm$ 4.0             |                 |                       |             |                 |
| <b>HuR expression</b>        |    |                            |                 |                       |             |                 |
| Low                          | 43 | 43.0 $\pm$ 4.1             | 0.035           | 1.411                 | 1.030-1.932 | 0.232           |
| High                         | 38 | 29.9 $\pm$ 4.0             |                 |                       |             |                 |

HuR, human antigen R; circ-HuR, circular RNA derived from HuR; CNBP, CCHC-type zinc finger nucleic acid binding protein; TNM, tumor-node-metastasis. Log-rank test and Cox regression model were applied for univariate and multivariate analysis. *n*, number of patients; SEM, standard error of the mean; 95% CI, 95% confidence interval.

**Table S2 Primer sets used for RT-PCR, qPCR, RIP, and ChIP**

| Primer set                      | Primers | Sequence                       | Product size (bp) | Application         |
|---------------------------------|---------|--------------------------------|-------------------|---------------------|
| circ-HuR<br>(Divergent)         | Forward | 5'-ACAAAAACGTGGCACTCCTCT-3'    | 186               | RT-PCR<br>qPCR, RIP |
|                                 | Reverse | 5'-GGTTTTTGACTGGAGCCTCAA-3'    |                   |                     |
| lin-HuR<br>(Convergent)         | Forward | 5'-TTGAGGCTCCAGTCAAAAACC-3'    | 340               | RT-PCR<br>qPCR, RIP |
|                                 | Reverse | 5'-AGAGGAGTGCCACGTTTTTGT-3'    |                   |                     |
| hsa_circ_23897<br>(Divergent)   | Forward | 5'-ATGACCCAGAAGGACGTAGAAG-3'   | 185               | RT-PCR<br>qPCR      |
|                                 | Reverse | 5'-CTGAGGGAGGTAGTTGACGATC-3'   |                   |                     |
| lin_circ_23897<br>(Convergent)  | Forward | 5'-GATCGTCAACTACCTCCCTCAG-3'   | 305               | RT-PCR<br>qPCR, RIP |
|                                 | Reverse | 5'-CTTCTACGTCCTTCTGGGTCAT-3'   |                   |                     |
| hsa_circ_0049026<br>(Divergent) | Forward | 5'-CAGGTTCTGTGTTAAACGCTGT-3'   | 180               | RT-PCR<br>qPCR      |
|                                 | Reverse | 5'-GGTTTTTGACTGGAGCCTCAA-3'    |                   |                     |
| β-actin<br>(Divergent)          | Forward | 5'-AAATCGTGCCTGACATTAAGGAGA-3' | -                 | RT-PCR              |
|                                 | Reverse | 5'-CATACCCCTCGTAGATGGGCA-3'    |                   |                     |
| β-actin<br>(Convergent)         | Forward | 5'-TGCCCATCTACGAGGGGTATG-3'    | 156               | RT-PCR,<br>qPCR     |
|                                 | Reverse | 5'-TCTCCTTAATGTCACGCACGATTT-3' |                   |                     |
| GAPDH                           | Forward | 5'-AGAAGGCTGGGGCTCATTG-3'      | 258               | qPCR                |
|                                 | Reverse | 5'-AGGGGCCATCCACAGTCTTC-3'     |                   |                     |
| U1                              | Forward | 5'-ACTTACCTGGCAGGGGAGATACC-3'  | 137               | qPCR                |
|                                 | Reverse | 5'-CCACTACCACAAATTATGCAGTCG-3' |                   |                     |
| HuR                             | Forward | 5'-GTCCTCGTGGATCAGACTAC-3'     | 277               | qPCR                |
|                                 | Reverse | 5'-TCATGTGATCGACGCCCATG-3'     |                   |                     |
| CNBP                            | Forward | 5'-GCTACAACCTGTGGCAAACC-3'     | 213               | qPCR                |
|                                 | Reverse | 5'-GTGCAAGGTGCCCTGACT-3'       |                   |                     |
| CCND2                           | Forward | 5'-ACCTTCCGCAGTGCTCCTAC-3'     | 161               | qPCR                |
|                                 | Reverse | 5'-CCCAGCCAAGAAACGGTCCA-3'     |                   |                     |
| CTNNB1                          | Forward | 5'-TGCTGAAGGTGCTATCTGTC-3'     | 198               | qPCR                |
|                                 | Reverse | 5'-GAAGCTGAACAAGAGTCCCA-3'     |                   |                     |
| MMP-14                          | Forward | 5'-GCCTTCTGTTCTCTGATAA-3'      | 225               | qPCR                |
|                                 | Reverse | 5'-CCATCCTTCCTCTCGTAG-3'       |                   |                     |
| c-Myc                           | Forward | 5'-ATTCTCTGCTCTCCTCGACG-3'     | 224               | qPCR                |
|                                 | Reverse | 5'-CAGTGGGCTGTGAGGAGGTT-3'     |                   |                     |
| HuR ChIP<br>(-679/-455)         | Forward | 5'-TGCATGATTTCTACTAGGGCATT-3'  | 225               | qPCR                |
|                                 | Reverse | 5'-TGAGGAGGCGGGGCATGGAACG-3'   |                   |                     |
| MMP-14 ChIP<br>(-850/-604)      | Forward | 5'-CTCCCTTCCCTACATACCTCCA-3'   | 247               | qPCR                |
|                                 | Reverse | 5'-GTCATTTGTAATGTGGCTGCAC-3'   |                   |                     |
| c-Myc ChIP<br>(-1199/-961)      | Forward | 5'-CTCCCGTCTAGCACCTTTGATT-3'   | 239               | qPCR                |
|                                 | Reverse | 5'-GGCGTCTGTTAGCCCTGAGAT-3'    |                   |                     |

HuR, human antigen R; circ-HuR, circular RNA derived from HuR; GAPDH, glyceraldehyde 3-phosphate dehydrogenase; U1, U1 small nuclear 1; CNBP, CCHC-type zinc finger nucleic acid binding protein; CCND2, cyclin D2; CTNNB1, catenin beta 1; MMP-14, matrix metalloproteinase 14; c-Myc, MYC proto-oncogene, bHLH transcription factor; RT-PCR, reverse transcription PCR; qPCR, quantitative PCR; RIP, RNA immunoprecipitation; ChIP, chromatin immunoprecipitation.



**Table S3 Primer sets used for constructs**

| Primer Set               | Sequences                                                                                                                                     |
|--------------------------|-----------------------------------------------------------------------------------------------------------------------------------------------|
| pLCDH-circ-HuR           | 5'-CCGGAATTCTGAAATATGCTATCTTACAGGACACAGCTTGGGCTATGGCTTT-3' (sense);<br>5'-CGCGGATCCTCAAGAAAAAATATATTCACCTGAATCTCTGCGCCTGGTGGTG-3' (antisense) |
| pLCDH-lin-HuR            | 5'-CCGGAATTCTGAAATATGCTATCTTACAGGACACAGCTTGGGCTATGGCTTT-3' (sense);<br>5'-CGCGGATCCGGCTGAATCTCTGCGCCTGGTGGTG-3' (antisense)                   |
| pLCDH-circ_23897         | 5'-CCGGAATTCTGAAATATGCTATCTTACAGATTTTTGAAAAATACAATGTCTA-3' (sense);<br>5'-CGCGGATCCTCAAGAAAAAATATATTCACCTGTAGTCTGATCCACGAGGACC-3' (antisense) |
| pLCDH-lin_23897          | 5'-CCGGAATTCTGAAATATGCTATCTTACAGATTTTTGAAAAATACAATGTCTA-3' (sense);<br>5'-CGCGGATCCGGCTGTAGTCTGATCCACGAGGACC-3' (antisense)                   |
| pCMV-3Tag-1A-CNBP-WT     | 5'-CGCGGATCCATGAGCAGCAATGAGTGCTT-3' (sense);<br>5'-CCGCTCGAGTTAGGCTGTAGCCTCAATTG-3' (antisense)                                               |
| pCMV-3Tag-1A-CNBP-ΔRGG-1 | 5'-CGCGGATCCATGAGCAGCAATGAGTGCTT-3' (sense-1);<br>5'-CAAAGTGGAAAGTAGGACATTCCCGGGCCC-3' (antisense-1)                                          |
| pCMV-3Tag-1A-CNBP-ΔRGG-2 | 5'-ATGTCCTACTTTCCAGTTTGTTCCTCGTC-3' (sense-2);<br>5'-CCGCTCGAGTTAGGCTGTAGCCTCAATTG-3' (antisense-2)                                           |
| pCMV-3Tag-1A-CNBP-Δ1-RGG | 5'-CGCGGATCCCCAGACATTTGTTATCGCTG-3' (sense);<br>5'-CCGCTCGAGTTAGGCTGTAGCCTCAATTG-3' (antisense)                                               |
| pCMV-3Tag-1A-CNBP-Δ5-7   | 5'-CGCGGATCCATGAGCAGCAATGAGTGCTT-3' (sense);<br>5'-CCGCTCGAGTGCATGGTCGCAGTCACGAG-3' (antisense)                                               |
| pGEX-6P-1-CNBP-WT        | 5'-CGCGGATCCATGAGCAGCAATGAGTGCTT-3' (sense);<br>5'-CCGCTCGAGTTAGGCTGTAGCCTCAATTG-3' (antisense)                                               |
| pGEX-6P-1-CNBP-ΔRGG-1    | 5'-CGCGGATCCATGAGCAGCAATGAGTGCTT-3' (sense-1);<br>5'-CAAAGTGGAAAGTAGGACATTCCCGGGCCC-3' (antisense-1)                                          |
| pGEX-6P-1-CNBP-ΔRGG-2    | 5'-ATGTCCTACTTTCCAGTTTGTTCCTCGTC-3' (sense-2);<br>5'-CCGCTCGAGTTAGGCTGTAGCCTCAATTG-3' (antisense-2)                                           |
| pGEX-6P-1-CNBP-Δ1-RGG    | 5'-CGCGGATCCCCAGACATTTGTTATCGCTG-3' (sense);<br>5'-CCGCTCGAGTTAGGCTGTAGCCTCAATTG-3' (antisense)                                               |
| pGEX-6P-1-CNBP-Δ5-7      | 5'-CGCGGATCCATGAGCAGCAATGAGTGCTT-3' (sense);<br>5'-CCGCTCGAGTGCATGGTCGCAGTCACGAG-3' (antisense)                                               |
| pGL3-HuR promoter WT     | 5'-CGGGGTACCGGCACGAGAATCACTTGAATAGGG-3' (sense);<br>5'-CCCAAGCTTCCGCCCGGTAAGGTAGGAAAGGT-3' (antisense)                                        |
| pGL3-HuR promoter Mut    | 5'-TTTAATGAATCCGCACCCTGCTGAGCCTTCGGAACTGGCTTGCTCAA-3' (sense);<br>5'-AGGCTCAGCAGGGTGCGGATTCATTAATAATGTCATTGAGCGCCTACTG-3' (antisense)         |
| pGL3-CNBP reporter       | 5'-CAAATGAGAATAAAATGAGATATCTGAAAATATACTGAAAATA-3' (sense);<br>5'-AGCTTATTTTCAGTATATTTTCAGATATCTCATTTTATTCTCATTTGGTAC-3' (antisense)           |
| pGL3-c-Myc promoter      | 5'-CGGAAGATCTGTTTGTCCGGGGAGGAAAGAGTT-3' (sense);<br>5'-CCCAAGCTTCCGCTGGAATTAACAGCGAGTT-3' (antisense)                                         |

HuR, human antigen R; lin, linear; CNBP, CCHC-type zinc finger nucleic acid binding protein; RGG, arginineglycine-glycine-rich region; WT, wild type; Mut, mutation; c-Myc: MYC proto-oncogene, bHLH transcription factor.

**Table S4 Oligonucleotide sets used for CRISPR-dCas9, short hairpin RNAs, or probe**

| Oligo Set                              |           | Sequences                                                        |
|----------------------------------------|-----------|------------------------------------------------------------------|
| sgRNA-CRISPRi-CNBP #1                  | Forward   | 5'-CACCGGCCGTGTGCAGACCCGCGTG-3'                                  |
|                                        | Reverse   | 5'-AAACCACGCGGGTCTGCACACGGCC-3'                                  |
| sgRNA-CRISPRi-CNBP #2                  | Forward   | 5'-CACCGGCCGTGTGGCGCAGGCAAGGA-3'                                 |
|                                        | Reverse   | 5'-AAACTCCTTGCTGCGCCACACGCC-3'                                   |
| sh-Scb                                 | Antisense | 5'-CCGGGCGAACGATCGAGTAAACGGACTCGAGTCCGTTTACTCGATCGTTCGCTTTTT-3'  |
|                                        | Sense     | 5'-AATTCAAAAAGCGAACGATCGAGTAAACGGACTCGAGTCCGTTTACTCGATCGTTCGC-3' |
| sh-circ-HuR #1                         | Antisense | 5'-CCGGTCAGAGATTCAGGACACAGCCTCGAGGCTGTGTCCTGAATCTCTGTTTTTG-3'    |
|                                        | Sense     | 5'-GATCCAAAAACAGAGATTCAGGACACAGCCTCGAGGCTGTGTCCTGAATCTCTGA-3'    |
| sh-circ-HuR #2                         | Antisense | 5'-CCGGTAGATTCAGGACACAGCTTGCTCGAGCAAGCTGTGTCCTGAATCTTTTTTG-3'    |
|                                        | Sense     | 5'-GATCCAAAAAAGATTCAGGACACAGCTTGCTCGAGCAAGCTGTGTCCTGAATCTA-3'    |
| circ-HuR probe                         | Antisense | 5'-AGCCCAAGCTGTGTCCTGAATCTCTGCGCC-3'                             |
|                                        | Sense     | 5'-GGCGCAGAGATTCAGGACACAGCTTGGGCT-3'                             |
| circ_23897 probe                       | Antisense | 5'-GTATTTTTCAAAAATCTGTAGTCTGATCCACGAGG-3'                        |
| HuR mRNA probe                         | Antisense | 5'-ATCGACGCCCATGGGGGAGAACCTGAATCT-3'                             |
| circ-HuR transcription <i>in vitro</i> | Forward   | 5'-TAATACGACTCACTATAGGGGACACAGCTTGGGCTATGGCTTT-3'                |
|                                        | Reverse   | 5'-CTGAATCTCTGCGCCTGGTGGTG-3'                                    |
| circ-HuR circularization               | Guide DNA | 5'-AGCCCAAGCTGTGTCAATCTCTGCGCCTGG-3'                             |

sgRNA, small guide RNA; CRISPRi, clustered regularly interspaced short palindromic repeats interference; dCas9, dead mutant of Cas9 endonuclease; Scb, scramble; shRNA, short hairpin RNA; HuR, human antigen R; circ-HuR, circular RNA derived from HuR.
